# Supplementary material
Source: publisher site journal article supplement (https://www.dovepress.com/article/491768)
Supplement: Supplementary file 1 [file get_supplementary_file.php]

| Variables | Vortioxetine (n=31) | Escitalopram (n=47) | P | Time | Group | Time×Group |
| --- | --- | --- | --- | --- | --- | --- |
| HAMD-17 |  |  |  |  |  |  |
| Baseline | 23.55±4.32 | 23.49±3.95 | 0.951 |  |  |  |
| 2 weeks | **17.06±5.54** | **17.38±6.05** | 0.817 | P <0.001 | P=0.841 | P=0.808 |
| 4 weeks | **15.65±5.64** | **14.47±6.26** | 0.407 |  |  |  |
| 8 weeks | **12.53±****6.40** | **11.67±****7.26** | 0.473 |  |  |  |
|  |  |  |  |  |  |  |
| HAMA |  |  |  |  |  |  |
| Baseline | 20.32±6.08 | 21.47±7.15 | 0.471 |  |  |  |
| 2 weeks | **15.87±5.58** | **14.68±6.40** | 0.407 | P <0.001 | P=0.412 | P=0.472 |
| 4 weeks | **15.03±5.72** | **13.53±6.83** | 0.321 |  |  |  |
| 8 weeks | **12.02±6.34** | **10.51±7.51** | 0.219 |  |  |  |
|  |  |  |  |  |  |  |
| SHAPS |  |  |  |  |  |  |
| Baseline | 31.90±6.98 | 31.81±6.77 | 0.953 |  |  |  |
| 2 weeks | 31.06±7.05 | 32.34±7.65 | 0.465 | P <0.001 | P=0.781 | P=0.380 |
| 4 weeks | 28.81±6.36 | 30.83±7.52 | 0.226 |  |  |  |
| 8 weeks | **29.20±8.07** | **27.98±7.64** | 0.386 |  |  |  |

Supplement Table 1 Comparison of clinical scales at baseline and after treatment using PP analysis

Data are presented as means ± SD.

T-test and repeated-measures ANOVA were used for the *P* value.

Bold text: *P* < 0.05 compared with baseline.
